# Supplementary material for: Proteomic Insight into the Molecular Function of the Vitreous
Source: PLoS One. 2015 May 28;10(5):e0127567. doi: 10.1371/journal.pone.0127567 (PMC4447289; doi:10.1371/journal.pone.0127567)
Supplement: S4 Table — (XLS) [file pone.0127567.s004.xls]

## Sheet: Pathway Maps
Enrichment analysis report of unique proteins-Anterior Hyaloid (human)
Enrichment by Pathway Maps					AH unique_genelist
#	Maps	Total	pValue	Min FDR	p-value	FDR	In Data	Network Objects from Active Data
1	G-protein signaling_Ras family GTPases in kinase cascades (schema)	26	2.28212e-06	0.0010726	2.28212e-06	0.0010726	6	JNK(MAPK8-10), p38 MAPK, c-Raf-1, p38alpha (MAPK14), B-Raf, p38beta (MAPK11)
2	Cell cycle_Influence of Ras and Rho proteins on G1/S Transition	53	1.61872e-05	0.00380399	1.61872e-05	0.00380399	7	c-Raf-1, CDK4, MLCK, MRLC, CDK2, JNK1(MAPK8), CDK6
3	Cytoskeleton remodeling_Cytoskeleton remodeling	102	2.78612e-05	0.00436493	2.78612e-05	0.00436493	9	p38 MAPK, c-Raf-1, eIF4G3, MELC, eIF4G1, MLCK, ILK, MRLC, eIF4G1/3
4	Mucin expression in CF airways	69	9.21232e-05	0.0108245	9.21232e-05	0.0108245	7	JNK(MAPK8-10), p38 MAPK, c-Raf-1, p38alpha (MAPK14), p90Rsk, G-protein alpha-q/11, JNK1(MAPK8)
5	Cytoskeleton remodeling_Alpha-1A adrenergic receptor-dependent inhibition of PI3K	19	0.000182328	0.0145065	0.000182328	0.0145065	4	MELC, MLCK, MRLC, G-protein alpha-q
6	Immune response _CCR3 signaling in eosinophils	77	0.00018519	0.0145065	0.00018519	0.0145065	7	p38 MAPK, c-Raf-1, Hck, MELC, MLCK, MRLC, FGR
7	Development_Keratinocyte differentiation	56	0.000219428	0.014733	0.000219428	0.014733	6	c-Raf-1, p38alpha (MAPK14), Cystatin A, p38delta (MAPK13), G-protein alpha-q/11, JNK1(MAPK8)
8	Development_Gastrin in cell growth and proliferation	62	0.000384927	0.0226145	0.000384927	0.0226145	6	JNK(MAPK8-10), c-Raf-1, p38alpha (MAPK14), p90Rsk, G-protein alpha-q/11, G-protein alpha-q
9	Development_Flt3 signaling	44	0.000568851	0.0297067	0.000568851	0.0297067	5	p38 MAPK, c-Raf-1, p90Rsk, Fyn, JNK1(MAPK8)
10	Translation_Regulation of translation initiation	27	0.000749525	0.0341782	0.000749525	0.0341782	4	eIF3S7, eIF4G1/3, eIF3S8, RPS6
11	Development_EGFR signaling pathway	71	0.000799915	0.0341782	0.000799915	0.0341782	6	p38 MAPK, c-Raf-1, JNK2(MAPK9), p38alpha (MAPK14), ILK, JNK1(MAPK8)
12	Ubiquinone metabolism	74	0.000996044	0.0372386	0.000996044	0.0372386	6	NDUFS2, NDUFB9, NDUFV2, NDUFS4, DAP13, NDUFB1
13	Immune response_C5a signaling	50	0.00103	0.0372386	0.00103	0.0372386	5	JNK(MAPK8-10), p38 MAPK, c-Raf-1, p90Rsk, B-Raf
14	Oxidative phosphorylation	105	0.00122228	0.0401255	0.00122228	0.0401255	7	NDUFS2, ATP5F1, NDUFB9, NDUFV2, NDUFS4, DAP13, NDUFB1
15	Cytoskeleton remodeling_Reverse signaling by ephrin B	31	0.0012806	0.0401255	0.0012806	0.0401255	4	c-Raf-1, ILK, PINCH, PINCH-2
16	Immune response_Fc epsilon RI pathway	55	0.00158936	0.0466874	0.00158936	0.0466874	5	JNK(MAPK8-10), p38 MAPK, c-Raf-1, PAK2, Slp76
17	Immune response_CD28 signaling	56	0.00172366	0.0476543	0.00172366	0.0476543	5	JNK(MAPK8-10), p38 MAPK, p38alpha (MAPK14), Slp76, Fyn
18	Regulation of lipid metabolism_Regulation of acetyl-CoA carboxylase 1 activity in lipogenic tissue	17	0.00214521	0.0504124	0.00214521	0.0504124	3	AMPK alpha subunit, AMPK gamma subunit, CPT-1A
19	Regulation of lipid metabolism_Regulation of acetyl-CoA carboxylase 1 activity in keratinocytes	17	0.00214521	0.0504124	0.00214521	0.0504124	3	AMPK alpha subunit, AMPK gamma subunit, CPT-1A
20	Transcription_Transcription factor Tubby signaling pathways	17	0.00214521	0.0504124	0.00214521	0.0504124	3	G-protein alpha-11, G-protein alpha-q/11, G-protein alpha-q
21	Cytoskeleton remodeling_Keratin filaments	36	0.00225756	0.0505263	0.00225756	0.0505263	4	JNK(MAPK8-10), Plakophilin 2, PPL(periplakin), Tubulin gamma 1
22	Histidine-glutamate-glutamine and proline metabolism/ Rodent version	120	0.00263539	0.0563015	0.00263539	0.0563015	7	MAOA, GLSK, PYCS, GLSL, P4HA, AL4A1, AOC3
23	Propionate metabolism p.1	39	0.00304087	0.0621396	0.00304087	0.0621396	4	PCCB, 3HIDH, HADHB, HCD2
24	DNA damage_Inhibition of telomerase activity and cellular senescence	20	0.00347571	0.0680661	0.00347571	0.0680661	3	CDK4, CDK2, CDK6
25	Transport_ACM3 in salivary glands	42	0.00399205	0.0700807	0.00399205	0.0700807	4	G-protein alpha-11, MLCK, G-protein alpha-q/11, G-protein alpha-q
26	Cell cycle_Cell cycle (generic schema)	21	0.0040092	0.0700807	0.0040092	0.0700807	3	CDK4, CDK2, CDK6
27	Immune response_Gastrin in inflammatory response	69	0.00431771	0.0700807	0.00431771	0.0700807	5	JNK(MAPK8-10), c-Raf-1, p38alpha (MAPK14), G-protein alpha-q/11, G-protein alpha-q
28	Regulation of metabolism_Role of Adiponectin in regulation of metabolism	43	0.00434913	0.0700807	0.00434913	0.0700807	4	AMPK alpha subunit, p38alpha (MAPK14), ACADM, CPT-1A
29	Development_A2A receptor signaling	43	0.00434913	0.0700807	0.00434913	0.0700807	4	JNK(MAPK8-10), p38 MAPK, p90Rsk, B-Raf
30	Development_Activation of Erk by ACM1, ACM3 and ACM5	44	0.00472716	0.0700807	0.00472716	0.0700807	4	G-protein alpha-11, c-Raf-1, B-Raf, G-protein alpha-q
31	Neurophysiological process_Receptor-mediated axon growth repulsion	45	0.00512668	0.0700807	0.00512668	0.0700807	4	c-Raf-1, CDK5, B-Raf, Fyn
32	Cell adhesion_Histamine H1 receptor signaling in the interruption of cell barrier integrity	45	0.00512668	0.0700807	0.00512668	0.0700807	4	MELC, MLCK, MRLC, G-protein alpha-q/11
33	Development_Thrombopoietin-regulated cell processes	45	0.00512668	0.0700807	0.00512668	0.0700807	4	c-Raf-1, B-Raf, p90RSK2(RPS6KA3), Fyn
34	Reproduction_GnRH signaling	72	0.00518002	0.0700807	0.00518002	0.0700807	5	JNK(MAPK8-10), c-Raf-1, p38alpha (MAPK14), p90Rsk, G-protein alpha-q/11
35	Cytoskeleton remodeling_Regulation of actin cytoskeleton by Rho GTPases	23	0.00521878	0.0700807	0.00521878	0.0700807	3	MELC, MLCK, MRLC
36	Immune response_MIF-JAB1 signaling	24	0.0058971	0.0722155	0.0058971	0.0722155	3	JNK(MAPK8-10), CDK4, CDK2
37	Development_GDNF signaling	24	0.0058971	0.0722155	0.0058971	0.0722155	3	c-Raf-1, p90Rsk, Fyn
38	G-protein signaling_M-RAS regulation pathway	24	0.0058971	0.0722155	0.0058971	0.0722155	3	c-Raf-1, B-Raf, A-Raf-1
39	Development_TGF-beta-dependent induction of EMT via MAPK	47	0.00599235	0.0722155	0.00599235	0.0722155	4	JNK(MAPK8-10), p38 MAPK, c-Raf-1, p38alpha (MAPK14)
40	Immune response_Histamine H1 receptor signaling in immune response	48	0.00645953	0.0741456	0.00645953	0.0741456	4	JNK(MAPK8-10), p38 MAPK, c-Raf-1, G-protein alpha-q/11
41	G-protein signaling_K-RAS regulation pathway	25	0.00662578	0.0741456	0.00662578	0.0741456	3	c-Raf-1, B-Raf, A-Raf-1
42	Cytoskeleton remodeling_Neurofilaments	25	0.00662578	0.0741456	0.00662578	0.0741456	3	CDK5, Tubulin gamma, Tubulin gamma 1
43	Development_Thromboxane A2 pathway signaling	49	0.00695028	0.0742416	0.00695028	0.0742416	4	p38 MAPK, c-Raf-1, B-Raf, G-protein alpha-q
44	Development_G-CSF signaling	49	0.00695028	0.0742416	0.00695028	0.0742416	4	JNK(MAPK8-10), p38 MAPK, c-Raf-1, Hck
45	Cell cycle_Regulation of G1/S transition (part 2)	26	0.00740572	0.0762737	0.00740572	0.0762737	3	CDK4, CDK2, CDK6
46	Development_EDNRB signaling	50	0.00746509	0.0762737	0.00746509	0.0762737	4	c-Raf-1, B-Raf, p90RSK2(RPS6KA3), G-protein alpha-q/11
47	Cytoskeleton remodeling_TGF, WNT and cytoskeletal remodeling	111	0.00763152	0.0763152	0.00763152	0.0763152	6	p38 MAPK, c-Raf-1, MELC, MLCK, ILK, MRLC
48	Neurophysiological process_GABA-A receptor life cycle	27	0.00823774	0.0768662	0.00823774	0.0768662	3	Gephyrin, Dynein 1, cytoplasmic, intermediate chains, Clathrin light chain
49	Development_IGF-1 receptor signaling	52	0.00856876	0.0768662	0.00856876	0.0768662	4	c-Raf-1, IGF-2, p90Rsk, RPS6
50	Signal transduction_Activation of PKC via G-Protein coupled receptor	52	0.00856876	0.0768662	0.00856876	0.0768662	4	c-Raf-1, MELC, MLCK, G-protein alpha-q/11

## Sheet: Info
Info
General
Date	2014-01-26
Server	portal.genego.com
Version	6.16.63671
Name	University of Iowa | Jessica Skeie | jessica-skeie@uiowa.edu
Login	uiowa47
Workflow Settings
Type	Enrichment
Signals	both
Distribution	intersection
Sorting method	statistically significant
Active Data
Name	Type	Size		Threshold	0
AH unique_genelist	General	277		P-value	1
