# Supplementary material for: Proteomic Insight into the Molecular Function of the Vitreous
Source: PLoS One. 2015 May 28;10(5):e0127567. doi: 10.1371/journal.pone.0127567 (PMC4447289; doi:10.1371/journal.pone.0127567)
Supplement: S8 Table — (XLS) [file pone.0127567.s008.xls]

## Sheet: Sheet1
Proteins in heatmap (ANOVA p-value <0.05)
AH = anterior hyaloid; VB = vitreous base; PH = posterior hyaloid; C = core
A	B	C	D	E	F	G	H
VC	AH, VB	AH	AH, VC, VB	VB	C, VC, VB	C	VC, C
OBSCN	COLQ	ESYT2	RHOA	CES1	IGKV1D-13	CTSC	GALNT2
ADH5	IGHV1-3	ALDH1B1	RHOC	IGLV3-10	COL27A1	GNAS	NPTX1
PPP2CA	IGHV1-18	ALDH1A3	S100A9		NEGR1	LRP11	C1RL
PPP2CB	IGHV1-69	ALDH1A2	VCL		VASN	AFTPH	SPOCK2
CRYM	IGHV1-46	EML2	NAPA		NEO1	PRC1	RP4-604K5.1
APOB	IGHV1-8	EGF	GSTM1		GRIA4	GRIP1	SEMA3F
FABP7	LAMP1	RRAGC	PYGM		FSTL1	MMRN2	GRM3
PNP	MYL6B	MAP4K4	PSME1		CADM1	EPX	CPNE1
RCVRN	FKBP1B	TNIK	SAR1A		SPOCK1	TMEM132A	MDN1
SEC14L2	PDE4D	ACP1	COPS6		RARRES2	PPT2	OBSCN
RPE65	KRT82	CAPS	RLBP1		SERPINI1	MYBBP1A	GALNS
TPR	DSP	DYNLRB1	GLUL		FSTL4	GPC1	CORO2A
HHATL	KRT28	UBQLN1	TPM3		NRCAM	GPD2	CTBS
SYNM	KRT27	ANXA7	CLTC		NRCAM	ANGPTL1	ANG
CLIC6	KRT10	ACTR1B	ACO1		CDHR1	EFCAB14	GM2A
MAPK3	KRT1	SNX2	CLIC1		AGRN	LFNG
PTRHD1	KRT14	CLEC11A	ST13		DAG1	L1CAM
MAPK1	KRT24	ERLIN2	ARHGAP1		IGFBP4	PROC
PDIA4	KRT33B	RPL13	LTA4H		F5	LSR
	KRT38	TRAPPC3	SERPINB1		RTBDN	SORL1
	KRT36	CNN2	ARHGDIB		WIF1	QSOX2
	KRT32	BOLA2B	RAB13		APP	C1QA
	KRT31	RPL27	RAB5C		ENPP2	SERPINE2
	FTH1		RAB5B		BTD	CST3
	IGBP1		RAB5A		SERPINA6
	TFG		ARPC4		CLEC3B
	KRT2		GLOD4		APOH
	KRT9		PDCD6IP		PROS1
	KRT18		ACTR2		CTSF
	PRSS3		CAPZA2		FSTL5
	MZT2B		AKR1C2		NCAM1
	SNAP25		AKR1C3		NFASC
	DSC1		RPS16		EFEMP1
	COL15A1		GNAS		FUCA1
	S100A8		GNAS		CDH2
	KRT20		ALDOA		SPARCL1
	CAT		RAN		CHL1
	C1QC		KRT73		C7
	CRABP2		KRT78		IGHV3-43
	RAC3		KRT74		AGT
	RAC2		ESD		SERPING1
	RAC1		TXN		TF
			AHCY		CFI
			CA2		AHSG
			LDHB		HPX
			HSP90AA1		IGHV3-23
			HSP90AB1		NPC2
			DSTN		SERPINC1
			SELENBP1		C4B
			MYH9		APOA1
			NME2		A2M
			HSPA1B		CP
			PYGB		FCGBP
			FHL1		C9
			DPYSL3		B3GNT1
			PRDX1		RBP3
			ACTB		CTSD
			ACTG1		TTR
			ACTA2		SERPINF1
			PKM		APLP2
			PKM		EFEMP1
			ENO3		APOE
			VIM		FRZB
			PRDX6		PTGDS
			ENO1		OAF
			RAB1B		IDS
			RAB35		ATP6AP1
			RAB15		PTPRG
			RAB8A		PLBD2
			RAB8B		LBP
			PMPCA		IGKV1D-39
			HIST1H1A		IGKV4-1
			MYL6		F10
			ACTN3		QSOX1
			AKR7A2		IGLV3-21
			CAPNS1		IGFALS
			CAP1		CNTN1
			HNRNPD		QPCT
			HSPB1		MUC7
			CBR3		SSH3
			PCBD1		IAH1
			GSTM2		PAPPA2
			GSTM5		SERPINA5
			MSN		MAN2A2
			DES		SERPINA10
			SPTAN1		CNTN2
			MYH11		SIAE
			MYH14		PTPRS
			ANXA5		SAG
			HNRNPK		ATRN
			HIST1H4H
			ALDH1A1
			HBB
			HBD
			HSPB1
			PMPCA
			KRT72
			LGALS3
			HSPA1L
			HIST1H1D
			HIST1H1E
			HIST1H1C
			ALDH3A2
			APRT
			PGD
			ANXA1
			TCP1
			PFN2
			CA3
			TGM2
			INA
			NEFM
			VAT1
			FABP5
			ALDH3A1
			IMPA1
			HSPA9
			HSPA6
			HNRNPA1
			VCP
			ATP5A1
			PFKL
			PGLS
			CNN3
			TAGLN
			PGM2
			HBA2
			HBG2
			HBG1
			ANXA2
			PLEC
			ACTN1
			ACTN1
			BLVRB
			CRYL1
			LANCL1
			EEF1G
			NME1
			TPM3
			SERPINB9
			PFN2
			IGHV4-28
			RP11-1407O15.2
			ATP6V1E1
			SLC25A5
			SLC25A6
			TBCA
			ALDH9A1
			MYH10
			GSS
			MYL9
			MYL12A
			CAPN1
